# Supplementary material for: Cell-specific ablation of Hsp47 defines the collagen-producing cells in the injured heart
Source: PubMed Central journal article supplement (PMC6693833; doi:10.1172/jci.insight.128722), 2019-08-08
Supplement: jciinsight-4-128722-s067.pdf [file jciinsight-4-128722-s067.pdf]

## **Cell-specific ablation of Hsp47 defines the collagen producing cells in the injured heart**

Hadi Khalil,<sup>1</sup> Onur Kanisicak,<sup>1,2</sup> Ronald J. Vagnozzi,<sup>1</sup> Anne Katrine Johansen,<sup>1</sup> Bryan D. Maliken,<sup>1</sup> Vikram Prasad,<sup>1</sup> Justin G. Boyer,<sup>1</sup> Matthew J. Brody,<sup>1</sup> Tobias Schips,<sup>1</sup> Katja K. Kilian,<sup>1</sup> Robert N. Correll,<sup>1,3</sup> Kunito Kawasaki,<sup>4</sup> Kazuhiro Nagata,<sup>4</sup> Jeffery D. Molkentin<sup>1,5</sup>

<sup>1</sup>Department of Pediatrics, Cincinnati Children's Hospital Medical Center, University of Cincinnati, Cincinnati, Ohio, USA

<sup>2</sup>Department of Pathology, University of Cincinnati, Cincinnati, Ohio, USA

<sup>3</sup>Department of Biological Sciences, University of Alabama, Tuscaloosa, Alabama, USA

<sup>4</sup>Institute for Protein Dynamics, Kyoto Sangyo University, Kyoto, Japan

<sup>5</sup>Howard Hughes Medical Institute, Cincinnati Children's Hospital Medical Center, Cincinnati, Ohio, USA

### **Data Supplement**

-Supplemental Figures 1-7

-Supplemental Tables 1-3

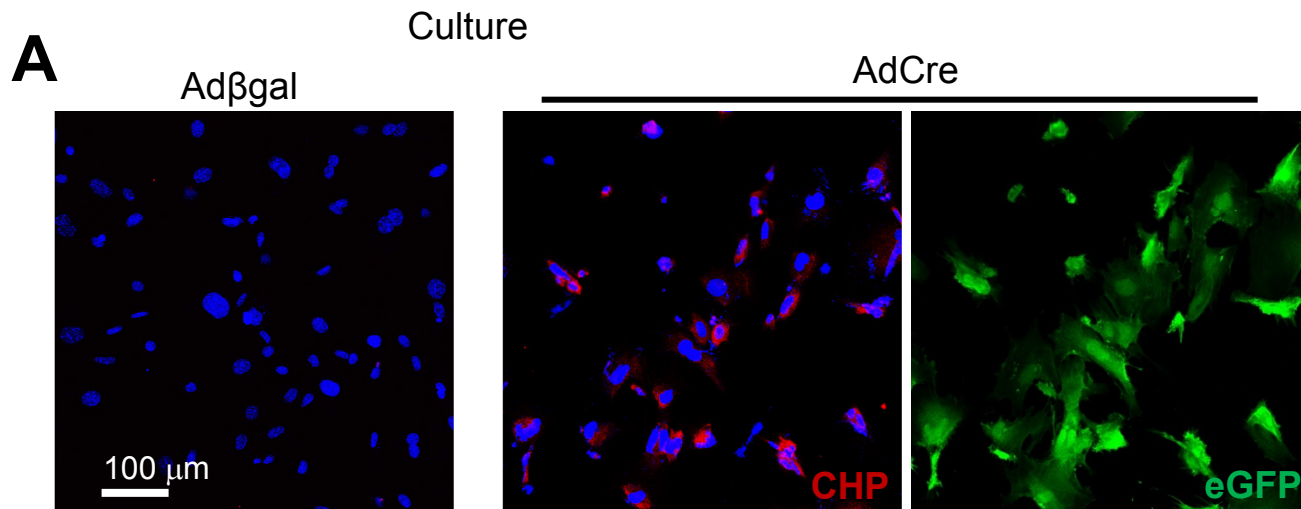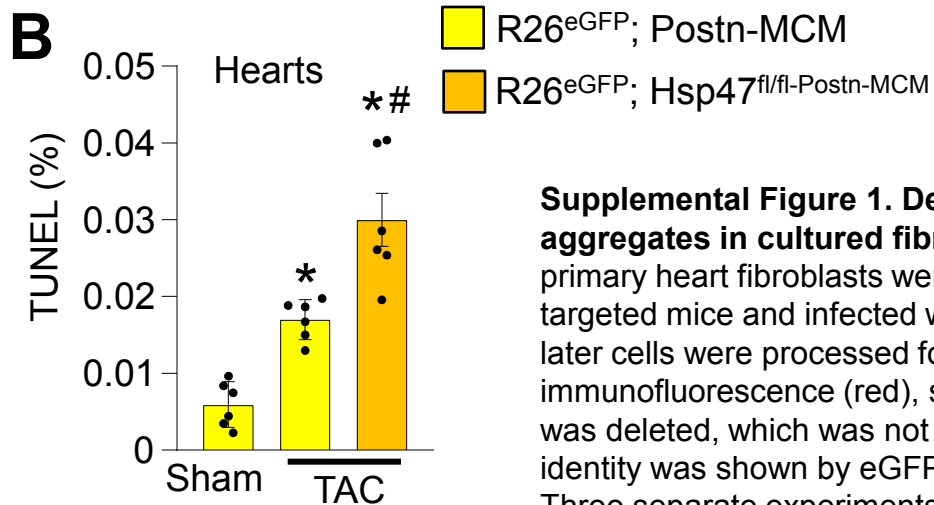

**Supplemental Figure 1. Deletion of *Hsp47* leads to collagen aggregates in cultured fibroblasts and cell death in vivo.** (A) Adult primary heart fibroblasts were isolated from R26<sup>eGFP</sup> *Hsp47*-loxP targeted mice and infected with Ad $\beta$ gal or AdCre. Seventy-two hours later cells were processed for collagen-hybridizing peptide immunofluorescence (red), showing collagen aggregates when *Hsp47* was deleted, which was not observed in Ad $\beta$ gal controls. Fibroblast identity was shown by eGFP staining in the AdCre infected conditions. Three separate experiments gave similar results. (B) TUNEL staining showing cell death levels in hearts of the indicated mice after 4 weeks post TAC. \*P<0.05 versus Sham; #P<0.05 versus R26<sup>eGFP</sup> Postn-MCM control. Number of mice analyzed is shown in the graph.

## Supplemental Figure 2

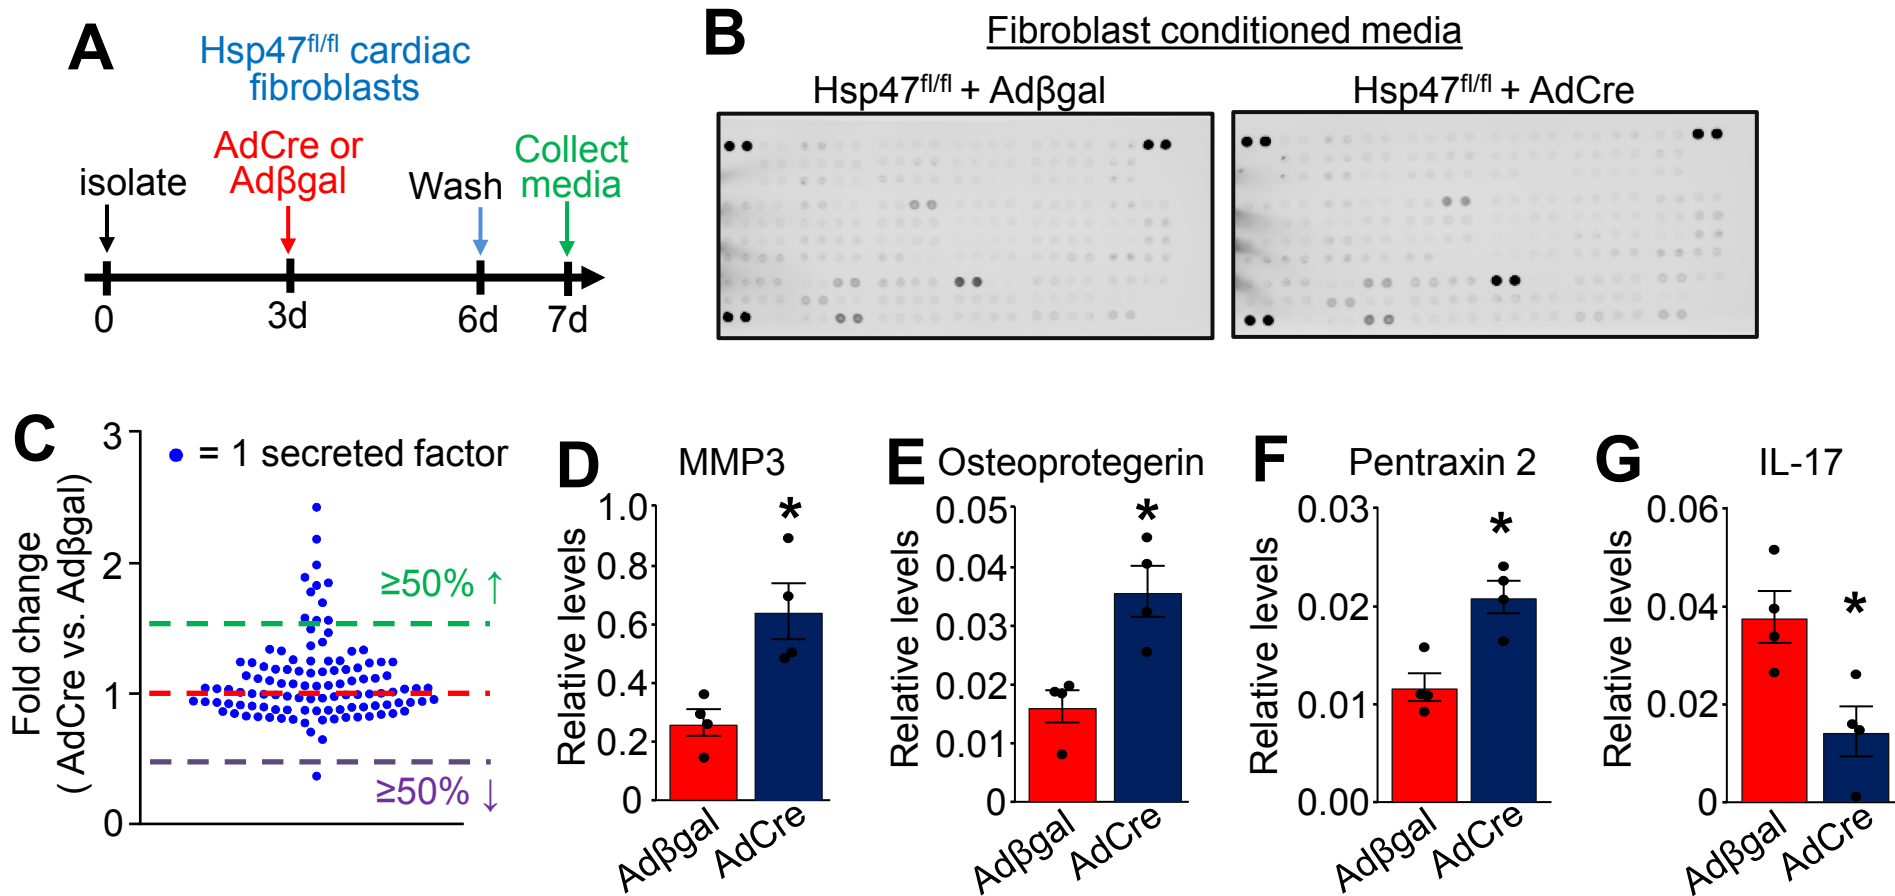

**Supplemental Figure 2. Secretome profiling of cardiac fibroblasts deleted for *Hsp47* in vitro.** (A) Adult primary heart fibroblasts were isolated from *Hsp47-loxP* targeted mice and infected with Adβgal (WT) or AdCre. Seventy-two hours after infection cells were treated with washed and maintained in serum free media for 24 hrs for media collection afterwards. (B) Representative membrane scans from sandwich immunoassays showing detection of 111 individual cytokines/secreted factors (in duplicate spots). Membranes were incubated with conditioned media from *Hsp47<sup>fl/fl</sup>* cardiac fibroblasts infected with either Cre (*Hsp47*-deleted) or β-galactosidase (WT) expressing adenoviruses. (C) Quantitation by relative densitometry shows the mean fold change in levels of each secreted protein factor between conditioned media from *Hsp47*-deleted versus WT fibroblasts ( $n=4$  per group). (D-G) Levels of select secreted factors that showed the largest difference in fold change of protein levels. \* $p<0.05$  by Student's t-test.

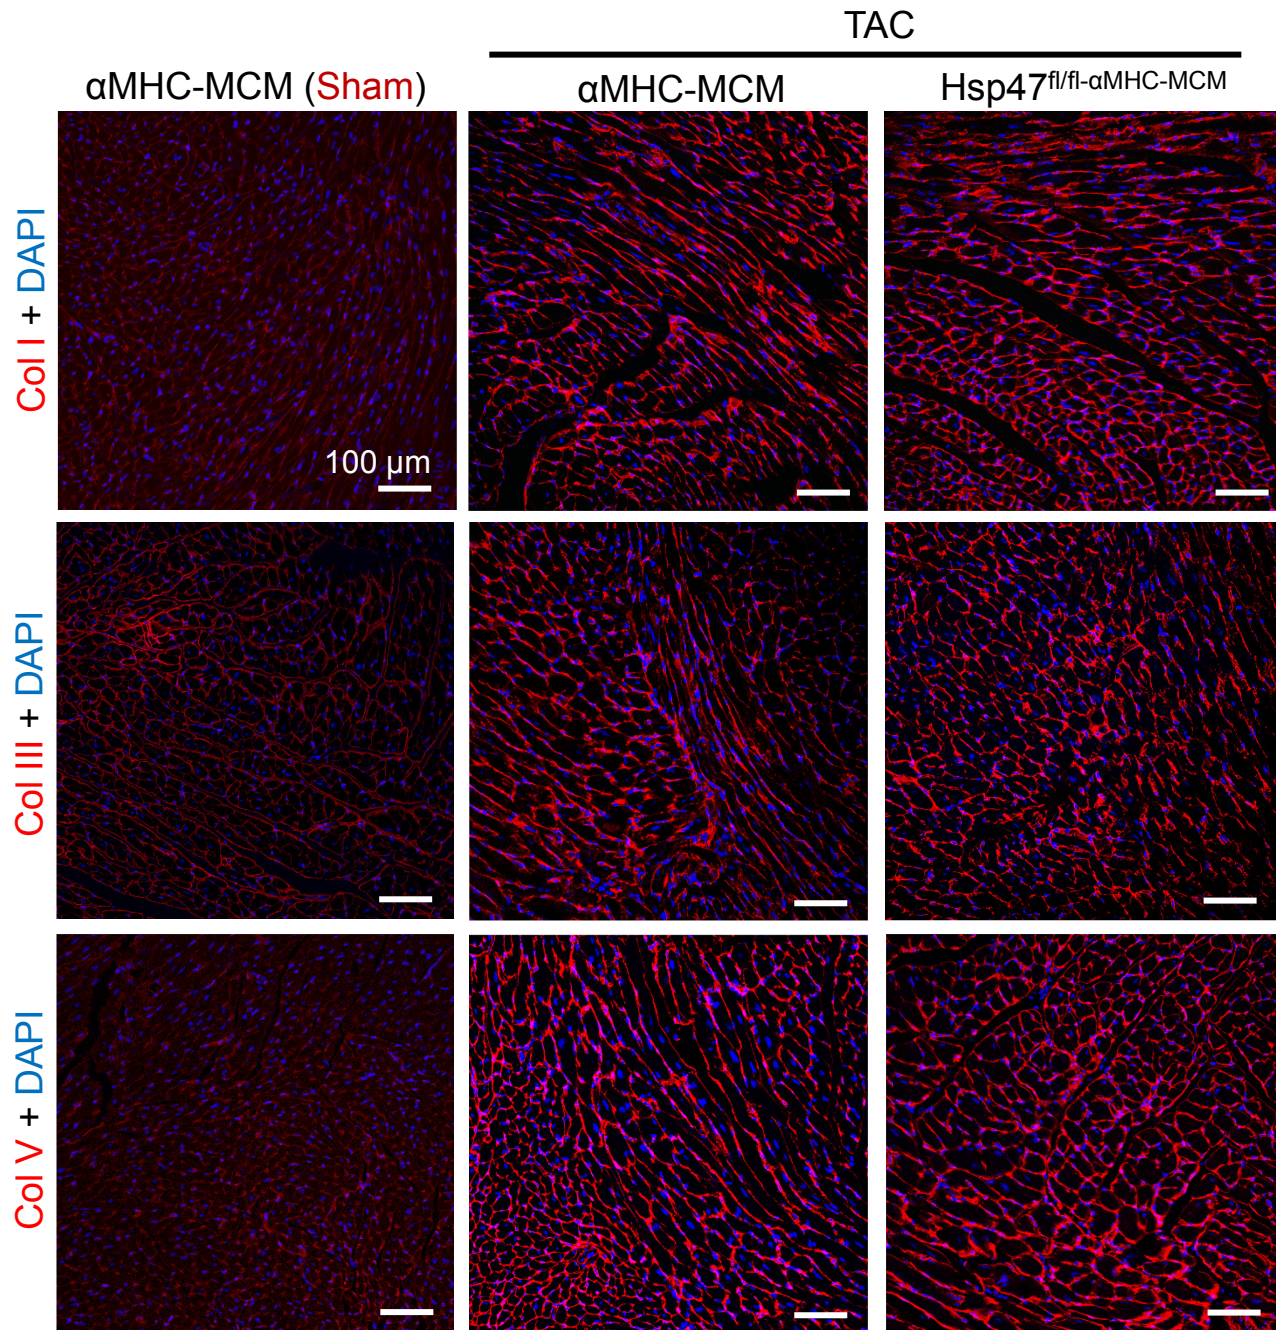

**Supplemental Figure 3.  
Cardiomyocyte-specific deletion  
of *Hsp47* does not reduce  
increased collagen deposition  
after TAC injury.**

Representative immunohistochemical adult heart images of collagens type-I, -III, and -V from control  $\alpha$ MHC-MCM transgenic mice and *Hsp47* cardiomyocyte-specific-deleted mice using this  $\alpha$ MHC-MCM transgene. Adult mice were subjected to sham or TAC surgical procedure and then analyzed 4 weeks later. DAPI was used to stain nuclei (blue) while collagens are stained in red fluorescence. Scale bar is 100  $\mu$ m.



# Supplemental Figure 4

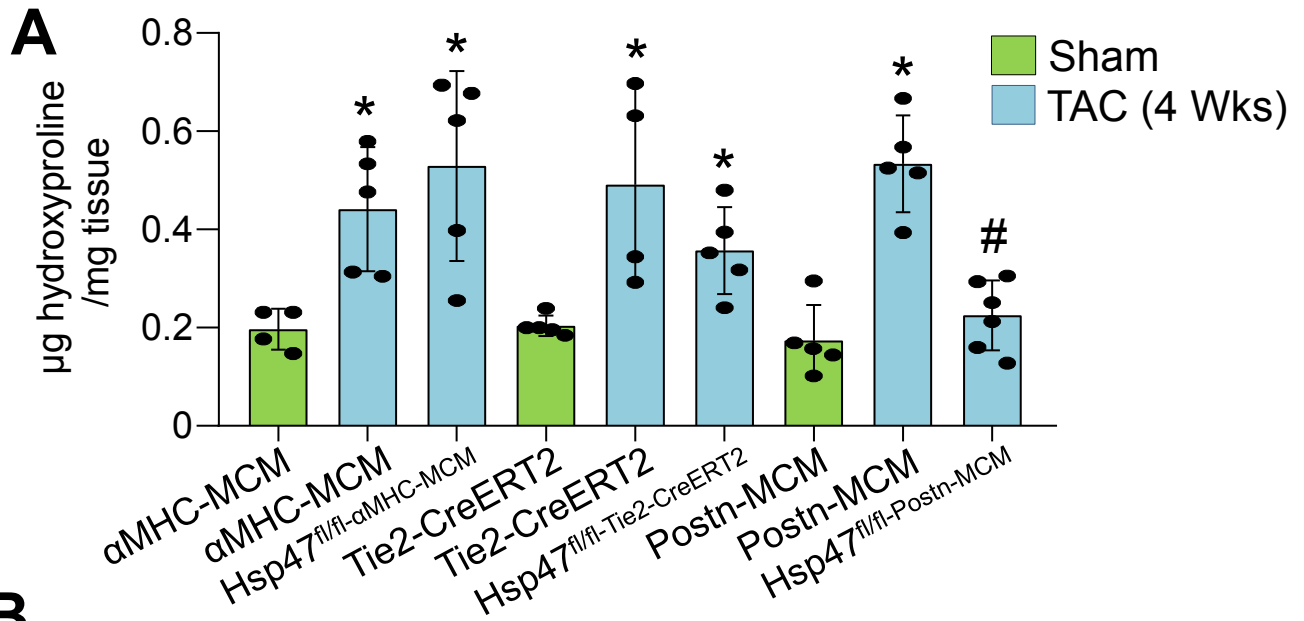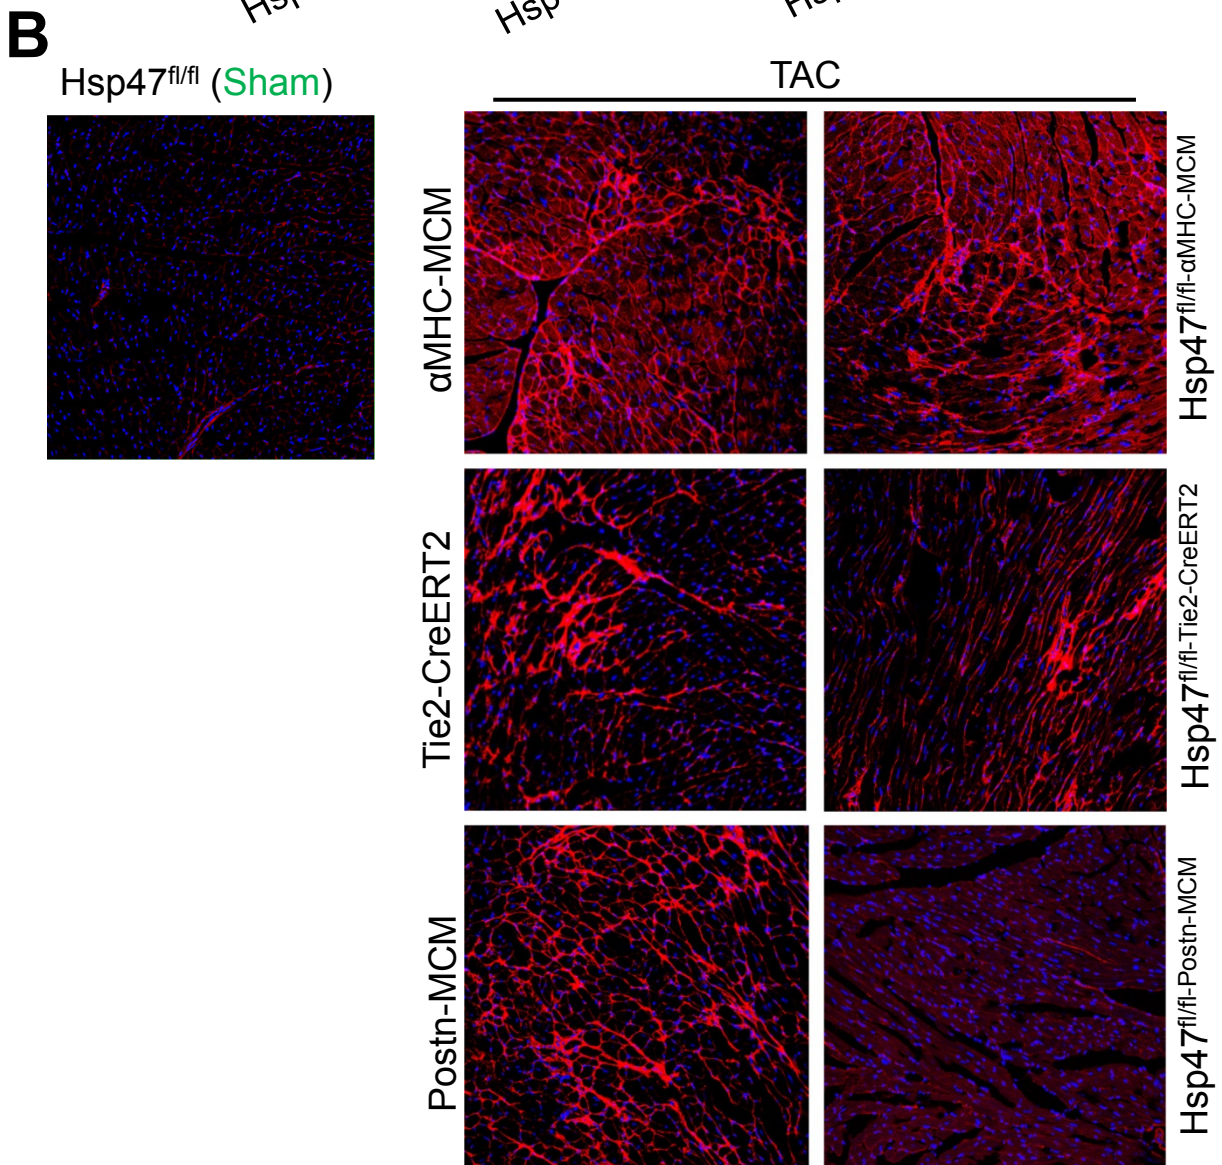

**Supplemental figure 4. Fibrosis quantitation in hearts deleted for *Hsp47* in cardiomyocytes, endothelial cells or myofibroblasts. (A)**

Hydroxyproline biochemical assay for fibrosis in whole heart ventricles of the genotypes of mice shown at 4 weeks after TAC injury. n=4-6. \*p<0.05 versus any of the 3 sham heart groups; #P<0.05 versus *Postn-MCM* with TAC. (B)

Unfolded collagens detected from heart histological sections using a biotin-conjugated collagen hybridizing peptide (CHP) that specifically binds unfolded collagen chains in the indicated mouse genotypes of sham and TAC-injured mice over 4 weeks. Scale bar 100  $\mu$ m. n=5-10 in each group.

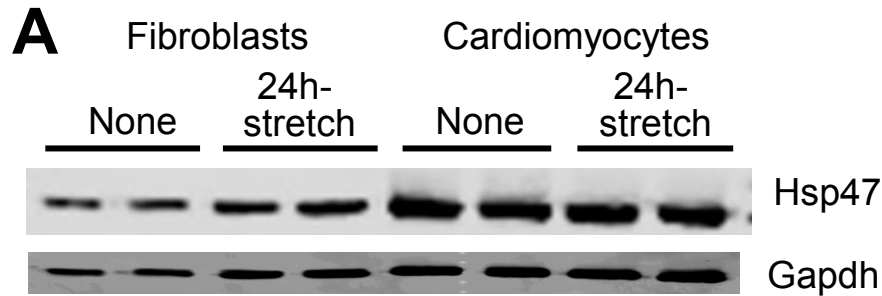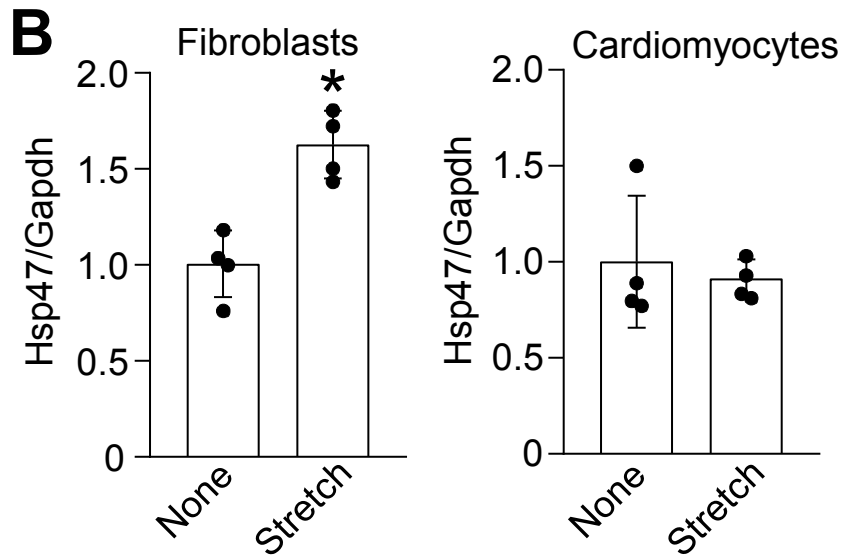

**Supplemental Figure 5. Hsp47 is induced in fibroblasts with stretch.** Neonatal rat cardiomyocytes and fibroblasts were isolated from the heart and subjected to stretch-induced stimulation. Cells were seeded on 6-well Flexcell culture plates and then a 20% stretch was placed on the silicon membranes. Stretch oscillations were performed continuously for 24 hours at 1.0 Hz. **(A)** Western blot analysis of Hsp47 and Gapdh in these 2 cell-types after 24 hrs stretch or without stretch. Gapdh is shown as a loading control and processing control. **(B)** Quantitation of data in "A" in 6 samples. \*  $P < 0.05$  versus non-stretched cells.

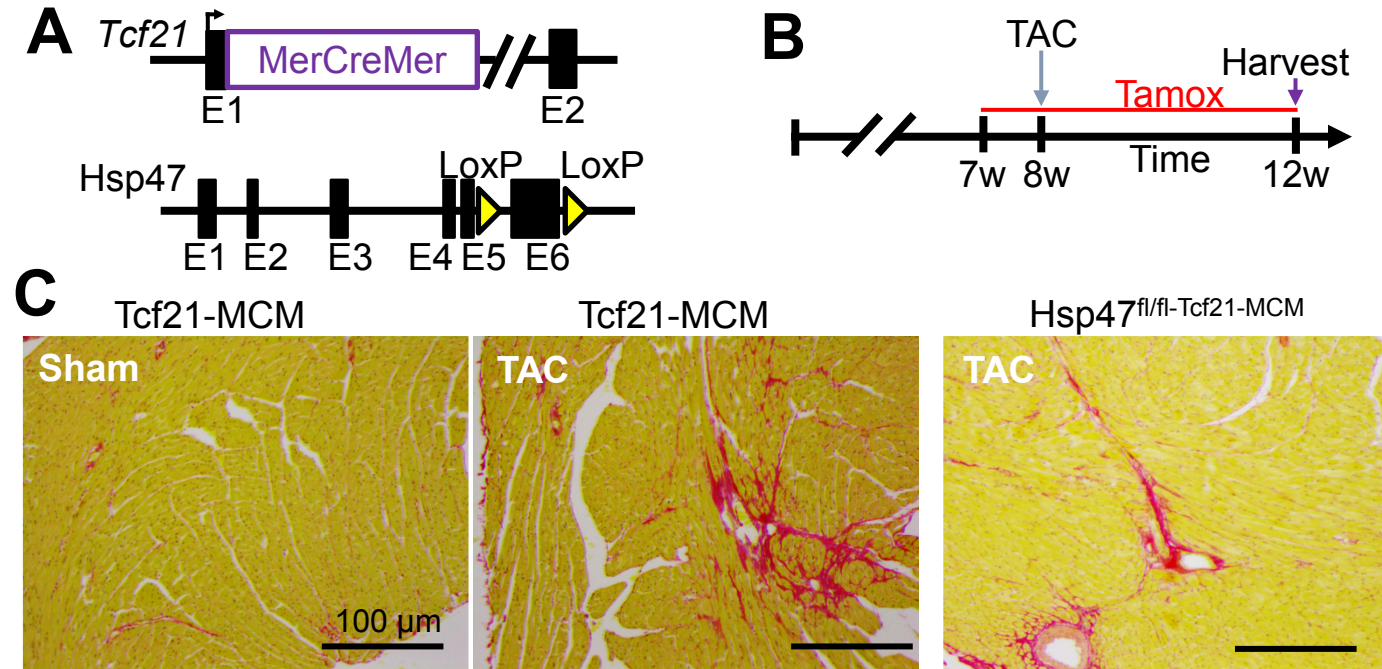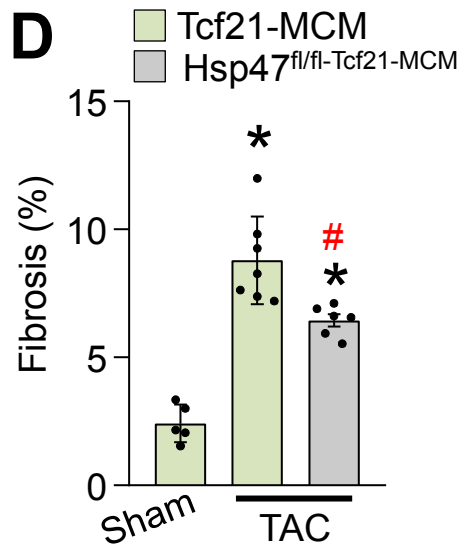

**Supplemental Figure 6. *Hsp47* deletion in *Tcf21*-lineage fibroblasts also reduces TAC-mediated fibrosis in the heart.** (A) Schematic representation of *Tcf21-MerCreMer* (MCM) targeted mice crossed with *Hsp47-loxP* targeted mice. (B) Experimental regimen of tamoxifen feed treatment (red horizontal line) in mice subjected to TAC for 4 weeks. (C) Picosirius red-stained histological sections from hearts of the indicated genotypes of mice after 4 weeks of TAC or a sham procedure in mice with fibroblast-specific deletion of *Hsp47* using the *Tcf21-MCM* allele. Control mice were either Sham and/or *Tcf21-MCM* only. (D) Quantitation of fibrotic area in the histological section similar to what is shown in "A". \*p<0.05 versus *Tcf21-MCM* Sham. #p<0.05 versus *Tcf21-MCM* TAC. n=5-7 mice in each group. p values were calculated using a one-way ANOVA multiple comparisons with Tukey's post-hoc test.



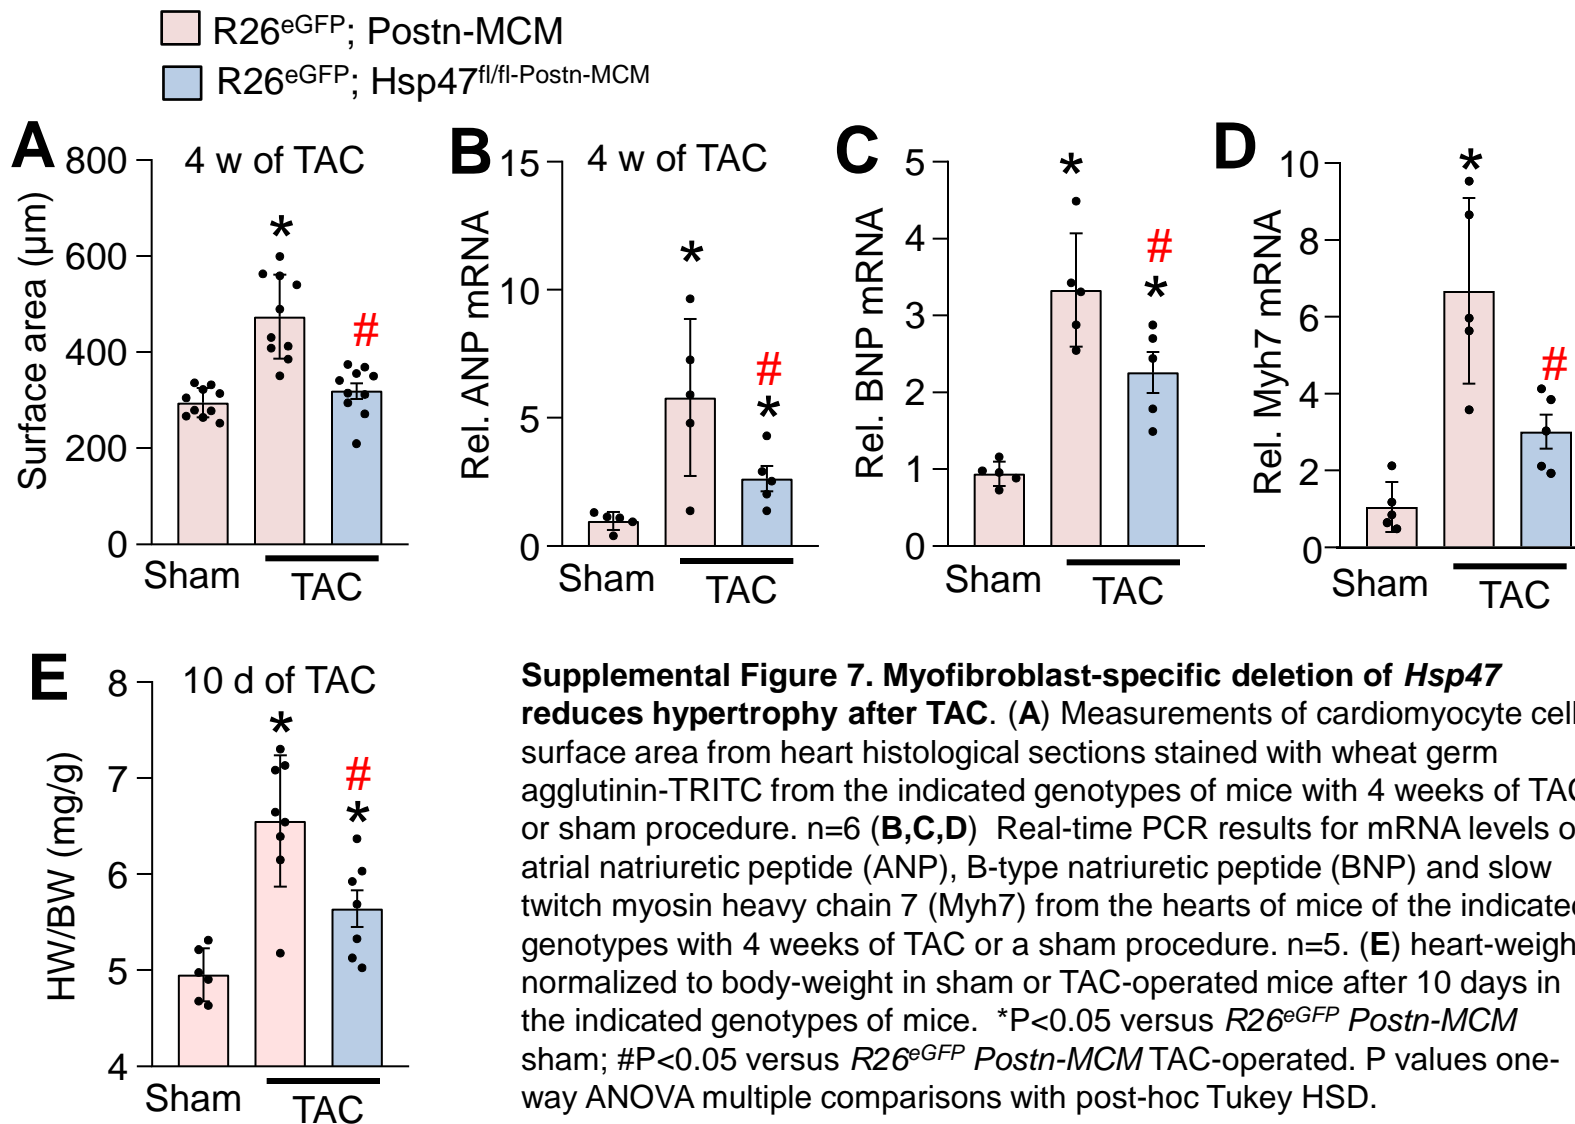

**Supplemental Figure 7. Myofibroblast-specific deletion of *Hsp47* reduces hypertrophy after TAC.** (A) Measurements of cardiomyocyte cell surface area from heart histological sections stained with wheat germ agglutinin-TRITC from the indicated genotypes of mice with 4 weeks of TAC or sham procedure. n=6 (B,C,D) Real-time PCR results for mRNA levels of atrial natriuretic peptide (ANP), B-type natriuretic peptide (BNP) and slow twitch myosin heavy chain 7 (Myh7) from the hearts of mice of the indicated genotypes with 4 weeks of TAC or a sham procedure. n=5. (E) heart-weight normalized to body-weight in sham or TAC-operated mice after 10 days in the indicated genotypes of mice. \*P<0.05 versus R26<sup>eGFP</sup> Postn-MCM sham; #P<0.05 versus R26<sup>eGFP</sup> Postn-MCM TAC-operated. P values one-way ANOVA multiple comparisons with post-hoc Tukey HSD.

**Table 1.** Representative gene groups from RNAseq upregulated in Hsp47 null cardiac fibroblasts vs WT with 4 weeks for TAC

|                   | Symbol    | Accession ID | Gene title                                                                                  | Fold  | p-value  |
|-------------------|-----------|--------------|---------------------------------------------------------------------------------------------|-------|----------|
| Chondrocyte like  | Cthrc1    | MGI:1915838  | collagen triple helix repeat containing 1                                                   | 4.05  | 0.0001   |
|                   | Cilp      | MGI:2444507  | cartilage intermediate layer protein, nucleotide pyrophosphohydrolase                       | 3.43  | 0.0003   |
|                   | Colec12   | MGI:2152907  | collectin sub-family member 12                                                              | 1.55  | 0.0001   |
|                   | Comp      | MGI:88469    | cartilage oligomeric matrix protein                                                         | 12.97 | 0.0035   |
|                   | Chad      | MGI:1096866  | chondroadherin                                                                              | 5.38  | 0.0020   |
|                   | Chadl     | MGI:3036284  | chondroadherin-like                                                                         | 1.80  | 0.0396   |
| Collagen assembly | Aspn      | MGI:1913945  | asporin                                                                                     | 1.97  | 0.0027   |
|                   | Sdc4      | MGI:1349164  | syndecan 4                                                                                  | 1.90  | 0.0103   |
|                   | Tnmd      | MGI:1929885  | tenomodulin                                                                                 | 4.23  | 0.0018   |
|                   | Fmod      | MGI:1328364  | fibromodulin                                                                                | 5.33  | 0.0009   |
|                   | Fbln5     | MGI:1346091  | fibulin 5                                                                                   | 1.95  | 0.0017   |
|                   | Smtn      | MGI:1354727  | smoothelin                                                                                  | 2.07  | 0.0030   |
|                   | Emilin1   | MGI:1926189  | elastin microfibril interfacier 1                                                           | 4.24  | 0.0020   |
| ECM               | Postn     | MGI:1926321  | periostin, osteoblast specific factor                                                       | 21.32 | 3.25E-06 |
|                   | Col8a2    | MGI:88464    | collagen, type VIII, alpha 2                                                                | 4.22  | 0.0035   |
|                   | Col12a1   | MGI:88448    | collagen, type XII, alpha 1                                                                 | 3.03  | 0.0025   |
|                   | Col22a1   | MGI:1916950  | collagen, type XXII, alpha 1                                                                | 5.37  | 6.88E-05 |
|                   | Fndc1     | MGI:1915905  | fibronectin type III domain containing 1                                                    | 2.26  | 0.0535   |
|                   | Fndc4     | MGI:1917195  | fibronectin type III domain containing 4                                                    | 2.21  | 0.0100   |
| ECM Modulation    | Mmp2      | MGI:97009    | matrix metalloproteinase 2                                                                  | 2.10  | 0.0010   |
|                   | Mmp3      | MGI:97010    | matrix metalloproteinase 3                                                                  | 2.35  | 0.1490   |
|                   | Mmp19     | MGI:1927899  | matrix metalloproteinase 19                                                                 | 1.48  | 0.1005   |
|                   | Mmp23     | MGI:1347361  | matrix metalloproteinase 23                                                                 | 2.61  | 0.1377   |
|                   | Adam9     | MGI:105376   | a disintegrin and metalloproteinase domain 9 (meltrin gamma)                                | 1.67  | 0.0117   |
|                   | Adamts6   | MGI:1347348  | a disintegrin-like and metalloproteinase (reprolysin type) with thrombospondin type 1 motif | 2.07  | 0.0072   |
|                   | Adamtsl2  | MGI:1925044  | ADAMTS-like 2                                                                               | 3.33  | 0.0538   |
|                   | Serpina3n | MGI:105045   | serine (or cysteine) peptidase inhibitor, clade A, member 3N                                | 1.87  | 0.0007   |
|                   | Serpinf1  | MGI:108080   | serine (or cysteine) peptidase inhibitor, clade F, member 1                                 | 2.24  | 0.0141   |

|                  |         |              |                                                              |       |          |
|------------------|---------|--------------|--------------------------------------------------------------|-------|----------|
|                  | Lox     | MGI:96817    | lysyl oxidase                                                | 2.18  | 0.1359   |
|                  | Loxl1   | MGI:106096   | lysyl oxidase-like 1                                         | 3.26  | 0.0883   |
| Cell Adhesion    | Itgb7   | MGI:96616    | integrin beta 7 [Source:MGI Symbol;Acc:]                     | 1.72  | 0.0547   |
|                  | Itga11  | MGI:2442114  | integrin alpha 11 [Source:MGI Symbol;Acc:]                   | 3.32  | 0.0004   |
|                  | Ctgf    | MGI:95537    | connective tissue growth factor [Source:MGI Symbol;Acc:]     | 2.63  | 0.0003   |
|                  | Cdh2    | MGI:88355    | cadherin 2 [Source:MGI Symbol;Acc:]                          | 2.01  | 0.0036   |
|                  | Chl1    | MGI:1098266  | cell adhesion molecule with homology to L1CAM                | -1.84 | 0.0098   |
|                  | Cdh7    | MGI:2442792  | cadherin 7, type 2                                           | -2.21 | 0.0028   |
|                  | Cadm1   | MGI:1889272  | cell adhesion molecule 1                                     | -1.69 | 0.0415   |
|                  | Adam12  | MGI:105378   | a disintegrin and metallopeptidase domain 12 (meltrin alpha) | -1.50 | 0.0250   |
|                  | Canx    | MGI:88261    | calnexin [Source:MGI Symbol;Acc:]                            | 3.87  | 0.0051   |
| Secreted factors | Ang     | MGI:88022]   | angiogenin, ribonuclease, RNase A family, 5                  | 3.50  | 1.94E-05 |
|                  | Angptl7 | MGI:3605801  | angiopoietin-like 7                                          | 4.29  | 0.0004   |
|                  | Ptn     | MGI:97804    | pleiotrophin                                                 | 2.23  | 0.0081   |
|                  | Sfrp2   | :MGI:108078  | secreted frizzled-related protein 2                          | 3.97  | 0.0018   |
|                  | Ccl3    | MGI:98260]   | chemokine (C-C motif) ligand 3                               | 2.50  | 0.0537   |
|                  | Fbns    | MGI:104648   | fibrosin                                                     | 2.29  | 0.0325   |
|                  | Cx3cl1  | MGI:1097153  | chemokine (C-X3-C motif) ligand 1                            | 4.82  | 0.0008   |
|                  | Clec4n  | MGI:1861231] | C-type lectin domain family 4, member n                      | 3.42  | 0.0009   |
| TGFB signaling   | Tgfb1   | MGI:98725    | transforming growth factor, beta 1                           | 2.59  | 0.0113   |
|                  | Ltbp2   | MGI:99502    | latent transforming growth factor beta binding protein 2     | 2.84  | 0.0030   |
|                  | Ltbp3   | MGI:1101355  | latent transforming growth factor beta binding protein 3     | 2.54  | 0.0120   |
|                  | Nlgn2   | MGI:2681835  | neuroligin 2                                                 | 2.78  | 0.0028   |
|                  | Furin   | MGI:97513    | furin (paired basic amino acid cleaving enzyme)              | 1.94  | 0.0028   |
|                  | Bmp6    | MGI:88182    | bone morphogenetic protein 6                                 | 2.25  | 0.0025   |

**Table 2.** List of primers used for qPCR to quantify the designated mRNA species

| Gene ID | Sense (5'-3')              | Antisense (5'-3')         |
|---------|----------------------------|---------------------------|
| Col1a1  | AATGGCACGGCTGTGTGCGA       | AACGGGTCCCCTTGGGCCTT      |
| Col1a2  | GCAGGTTACCTACTCTGTCT       | CTTGCCCCATTCAATTTGTCT     |
| Col3a1  | TCCCCTGGAATCTGTGAATC       | TGAGTCGAATTGGGGAGAAT      |
| Col4a1  | TTAAAGGACTCCAGGGACCAC      | CCCACTGAGCCTGTCACAC       |
| Col5a1  | GGGCAGAAGGGAAGCAAG         | GGCCTTGAGGACCGGTAG        |
| Col6a1  | GCAAGGATGAGCTGGTCAA        | GTCCACGTGCTCTTGTCATC      |
| Col11a1 | AAAACGAAACGGTGGATCTG       | TGTTTGTGCAAATCCTGTTG      |
| Vim     | GCCGAAAGCACCCCTGCAGTCA     | GCCTGCAGCTCCTGGATCTCTTCA  |
| Acta2   | TGACGCTGAAGTATCCGATAGA     | CGAAGCTCGTTATAGAAAGAGTGG  |
| Tnc     | TCCCCGGGACTGTAGCCAGC       | CGTGGCAGTCACTGGGGCAG      |
| Fbn     | TGACTGGCCACACGTGCATAG      | TGACATTGACCCCTTGTTGACAGGA |
| Fn      | AAGGCTGGATGATGGTGGAC       | TGAAGCAGGTTTCCTCGGTTG     |
| Timp1   | GCAACTCGGACCTGGTCATAA      | CGGCCCGTGATGAGAACT        |
| Mmp9    | AATCTCTTCTAGAGACTGGGAAGGAG | AGCTGATTGACTAAAGTAGCTGGA  |
| Mmp23   | CGACTTCTGCTACGAATCCC-3     | TTGGCGATGATGCTCAGGTG-3    |
| Zeb1    | GCTGGCAAGACAACGTGAAAG      | GCCTCAGGATAAATGACGGC      |
| Chd1    | AGCTCTAAGGACAGTGGTCAT      | CAGTGCTTTACATTCTCGGT      |
| Snai1   | GACCACTATGCCGCGCTCTT       | TCGCTGTAGTTAGGCTTCCGATT   |
| cdkn1a  | CCTGGTGATGTCCGACCTG        | CCATGAGCGCATCGCAATC       |
| Chad    | CTGGGTCTTTATGCTGTTGCT      | CCGTCTTGAGTTGTGCGAGA      |
| Cthrc1  | CAGTTGTCCGCACCGATCA        | GGTCCTTGTAGACACATTCCATT   |
| Aspn    | AAGGAGTATGTGATGCTACTGCT    | ACATTGGCACCCAAATGGACA     |
| Tnmd    | ACACTTCTGGCCCGAGGTAT       | GACTTCCAATGTTTCATCAGTGC   |
| Fmod    | AGCAGTCCACCTACTACGACC      | CAGTCGCATTCTTGGGGACA      |
| Sdc4    | TTTGCCGTTTTCTGATCCTG       | TTGCCCAAGTCGTAAGTCC       |
| Postn   | ACGGAGCTCAGGGCTGAAGATG     | GTTTGGGCCCTGATCCCGAC      |
| Mmp3    | ACCAACCTATTCTGGTTGCTGCT    | ATGGAAACGGGACAAGTCTGTGGA  |
| Lox     | TGATGCCAACACCCAGAGGA       | CGAATGTCACAGCGCACAAAC     |
| Itga11  | TGCCCAATGGAAACCAATG        | CACTCGTGCGACCAGAGAG       |
| Ptn     | CTCTGCACAATGCTGACTGTC      | ACAGCTTCTTACCTTGAGGCTT    |
| Tgfb2   | TCGACATGGATCAGTTTATGCG     | CCCTGGTACTGTTGTAGATGGA    |
| Furin   | TGGTTGCTATGGGTGGTCCG       | CCAGAAGTGGTAATAGTCACCGA   |
| Gapdh   | TTGTCTCCTGCGACTTCAAC       | GTCATACCAGGAAATGAGCTTG    |
| Cdh7    | GGGCAGGAGGGCTAGGCATTAACCT  | TAGCTGTCCTCCTGGAACAGGGCGT |
| Adam12  | AGACGTGCTGACTGTGCAAC       | CCGTGTGATTTGAGTGTGAGAGA   |
| Myh7    | ACAACCCCTACGATTATGCGT      | ACGTCAAAGGCACTATCCGTG     |
| ANP     | GCTTCCAGGCCATATTGGAG       | GGGGGCATGACCTCATCTT       |
| BNP     | GAGGTCACCTCCTATCCTCTGG     | GCCATTTCTCCGACTTTTCTC     |



Table 3. Echocardiographic assessment of the heart 4 weeks after TAC (supports Fig 1, C-M and Fig 2)

| <b>Genotype</b>                           | <b>Injury</b> | <b>IVSd (cm)</b> | <b>IVSs (cm)</b> | <b>LVIDd (cm)</b> | <b>LVIDs (cm)</b> | <b>LVPWd (cm)</b> | <b>LVPWs (cm)</b> | <b>FS (%)</b> |
|-------------------------------------------|---------------|------------------|------------------|-------------------|-------------------|-------------------|-------------------|---------------|
| <b>βMHC-Cre</b>                           | Sham          | 0.074±0.003      | 0.105±0.003      | 0.383±0.008       | 0.247±0.007       | 0.085±0.005       | 0.108±0.008       | 35.38±0.39    |
| <b>Hsp47<sup>fl/fl-βMHC-Cre</sup></b>     | Sham          | 0.072±0.002      | 0.107±0.004      | 0.390±0.008       | 0.257±0.005       | 0.083±0.006       | 0.117±0.006       | 37.16±0.10    |
| <b>βMHC-Cre</b>                           | TAC           | 0.081±0.001      | 0.123±0.005      | 0.446±0.015       | 0.316±0.012       | 0.109±0.004       | 0.138±0.006       | 29.14±1.19    |
| <b>Hsp47<sup>fl/fl-βMHC-Cre</sup></b>     | TAC           | 0.083±0.001      | 0.124±0.003      | 0.442±0.018       | 0.309±0.014       | 0.105±0.007       | 0.144±0.005       | 29.44±0.51    |
| <b>αMHC-MCM</b>                           | Sham          | 0.072±0.004      | 0.101±0.006      | 0.387±0.0229      | 0.265±0.019       | 0.087±0.005       | 0.106±0.005       | 36.54±0.55    |
| <b>αMHC-MCM</b>                           | TAC           | 0.079±0.005      | 0.129±0.006      | 0.434±0.0180      | 0.306±0.013       | 0.144±0.005       | 0.126±0.010       | 26.10±0.65    |
| <b>Hsp47<sup>fl/fl-αMHC-MCM</sup></b>     | TAC           | 0.084±0.005      | 0.127±0.008      | 0.429±0.0159      | 0.308±0.008       | 0.110±0.004       | 0.131±0.004       | 27.18±0.57    |
| <b>Tie2-CreERT2</b>                       | Sham          | 0.072±0.008      | 0.102±0.008      | 0.392±0.012       | 0.253±0.010       | 0.079±0.004       | 0.104±0.004       | 38.74±0.79    |
| <b>Tie2-CreERT2</b>                       | TAC           | 0.074±0.003      | 0.126±0.006      | 0.308±0.020       | 0.303±0.013       | 0.104±0.003       | 0.133±0.007       | 28.18±0.88    |
| <b>Hsp47<sup>fl/fl-Tie2-CreERT2</sup></b> | TAC           | 0.079±0.001      | 0.131±0.003      | 0.442±0.018       | 0.309±0.014       | 0.099±0.007       | 0.138±0.005       | 29.44±0.51    |
